# Supplementary material
Source: ML conference proceedings conference paper supplement (https://openreview.net/forum?id=b36m4ZYG1gD)
Supplement: supplementary_material [file attachment]

## 487 A Proofs of Lemmas and Theorems

### 488 A.1 Proof of Proposition 1

489 **Proposition 1.** *If the learning target is non-identifiable (i.e., every edge in the target is non-identifiable) a priori,*  
 490 *then SCL is not better than random guessing.*

491 **Re-statement:** We take learning target as the orientation of an edge as an example, so we are analyzing the  
 492 performance of a binary classifier against random guessing. The conclusion can be easily extended to general  
 493 case.

494 Denote random guessing as a degenerated estimator  $r(X) \equiv 0.5$ , which indicates the probability of label = 1 is  
 495 always 0.5, regardless of any input.

Denote the joint probability distribution of  $X$  and  $Y$  as  $\mathbb{P}$  and the space of all joint probability distribution is  $\mathcal{P}$ ,  
 then we aim to prove the following statement which is in an adversarial setting:

$$r = \arg \min_{f \in \mathcal{C}} \sup_{\mathbb{P} \in \mathcal{P}} E_{(X,Y) \sim \mathbb{P}} [-Y \log f(X) - (1 - Y) \log (1 - f(X))]$$

496 The expectation is the standard binary cross entropy loss; we are allowed to enumerate every possible joint  
 497 probability distribution in  $\mathcal{P}$  because the learning target is non-identifiable.  $\mathcal{C}$  is the space of all possible binary  
 498 classifiers.

*Proof.* Given any binary classifier  $f$ , we partition the space of  $X$  by  $A, B$  and  $C$  where  $A = \{x | f(x) > 0.5\}$ ,  
 $B = \{x | f(x) < 0.5\}$ ,  $C = \{x | f(x) = 0.5\}$ . Then we construct the following joint probability distribution  
 $P^*$ :

$$P^*(X, Y) = \begin{cases} P^*(Y = 0 | X = x) = 1 \text{ if } x \in A \\ P^*(Y = 1 | X = x) = 1 \text{ if } x \in B \\ \text{arbitrary if } x \in C \end{cases}$$

499 Then it is easy to see that  $E_{(X,Y) \sim P^*} [-Y \log f(X) - (1 - Y) \log (1 - f(X))] \geq 1$ . Note that  
 500  $E[-Y \log r(X) - (1 - Y) \log (1 - r(X))] \equiv 1$ , thus  $r$  achieves minimum worse-case loss.  $\square$

### 501 A.2 Proof of Proposition 2

502 **Proposition 2.** *If ML4C-Learner is a perfect classifier, then ML4C outputs correct CPDAG of a canonical*  
 503 *dataset (i.e., ML4C is perfect).*

504 *Proof.* Classical constraint-based methods consist of three steps: skeleton identification, v-structure identifica-  
 505 tion, and further edge orientation by applying Meek rules [37]. It has been proved in PC [34] that when learning  
 506 from a canonical dataset, if both the identified skeleton and v-structures are correct, then the learned CPDAG  
 507 is correct. ML4C follows the three steps, with the correct skeleton is given as input, and ML4C-Learner is  
 508 responsible for v-structure identification. Thus, assuming ML4C-Learner is a perfect classifier (i.e., correctly  
 509 identifies all v-structures) implies that ML4C outputs correct CPDAG.  $\square$

### 510 A.3 Proof of Lemma 1

511 **Lemma 1.** *Sepsets  $\mathcal{S}$  of any UT of a canonical dataset is non-empty.*

512 *Proof.* According to Lemma 3.3.9 of [35], in a directed acyclic graph  $G$ , if  $X$  is not a descendant of  $Y$ , and  
 513  $X$  and  $Y$  are not adjacent, then  $X$  and  $Y$  are d-separated by  $\mathbf{Parents}(Y)$ . Given an UT  $\langle X, T, Y \rangle$ ,  $X$  and  $Y$   
 514 are not adjacent. Either  $X$  is not a descendant of  $Y$ , or  $Y$  is not a descendant of  $X$ , otherwise a loop will be  
 515 introduced. Thus there either exists  $\mathbf{Parents}(X) \equiv PC_X \cup T$ , or  $\mathbf{Parents}(Y) \equiv PC_Y \cup T$ , which belongs to  
 516  $\mathcal{S}$ . Thus  $\mathcal{S}$  is non-empty.  $\square$

### 517 A.4 Proof of Lemma 2

518 **Lemma 2** (Existence of weak discriminative predicate). *For a canonical dataset with infinite samples,*  
 519 *the following are three weak discriminative predicates: i)  $\{X \sim Y | T\} > 0$ , ii)  $\{X \sim Y | PC_T\} = 0$ ,*  
 520 *iii)  $\{PC_X \sim PC_Y | \mathcal{S} \cup T\} > 0$ .*

521 *Proof.* For a canonical dataset with infinite samples,

- 522 1.  $\{X \sim Y | T\} > 0$ : 1)  $\langle X, T, Y \rangle$  is a v-structure  $\Rightarrow T$  is a collider  $\Rightarrow T$  unblocks  $X$  and  $Y$  through  
 523 path  $X - T - Y \Rightarrow \{X \sim Y | T\} > 0$  holds TRUE. 2) if  $\langle X, T, Y \rangle$  is not a v-structure, then  
 524  $\{X \sim Y | T\} > 0$  can be TRUE or FALSE. e.g., it is FALSE for  $X \rightarrow T \rightarrow Y$  (no more paths connect  
 525  $X$  and  $Y$ ), but if there exists another node  $X \rightarrow T' \rightarrow Y$ , it is evaluated TRUE. Therefore, it satisfies  
 526 criterion ii) of definition [12] but not i) hence it is a weak discriminative predicate.

- 527 2.  $\{X \sim Y | \mathcal{PC}_T\} = 0$ : 1)  $\langle X, T, Y \rangle$  is not a v-structure  $\Rightarrow T$  is a non-collider  $\Rightarrow \forall pc_t \in \mathcal{PC}_T$ , there  
528 exists a path  $X - T - Y$  from  $X$  to  $Y$ , where  $T$  is the only node on path,  $T$  is a non-collider,  
529 and  $T \notin \{pc_t\} \Rightarrow pc_t$  does not block the path  $\Rightarrow \{X \sim Y | \mathcal{PC}_T\} = 0$  always holds FALSE. 2) if  
530  $\langle X, T, Y \rangle$  is a v-structure, then  $\{X \sim Y | \mathcal{PC}_T\} = 0$  can be TRUE or FALSE. Therefore, it satisfies  
531 criterion i) but not ii) hence it's a weak discriminative predicate.
- 532 3.  $\{PC_X \sim PC_Y | S \cup T\} > 0$ : 1)  $\langle X, T, Y \rangle$  is a v-structure  $\Rightarrow T$  is a collider  $\Rightarrow \forall pc_x \in$   
533  $PC_X, pc_y \in PC_Y, S \in \mathcal{S}, S \cup T$  unblock  $pc_x$  and  $pc_y$  through path  $pc_x - X - T - Y - pc_y \Rightarrow$   
534  $\{pc_x \sim pc_y | S \cup T\} > 0$  always hold TRUE. 2) if  $\langle X, T, Y \rangle$  is not a v-structure then it can be TRUE  
535 or FALSE. Therefore, it satisfies criterion ii) but not i) hence it's a weak discriminative predicate.
- 536 □

## 537 A.5 Proof of Lemma 3

538 **Lemma 3** (Existence of strong discriminative predicate). *For a canonical dataset with infinite samples, the*  
539 *following are three strong discriminative predicates: i)  $OLP(T, S) = 0$ , ii)  $OLP(T, S) < 0.5$ , iii)  $OLP(T, S) <$*   
540  *$1 \wedge \min\{X \sim Y | T \cup S\} > 0$ .*

541 *Proof.* First, it is known that the following three algorithms are sound and complete for a canonical dataset with  
542 infinite samples: CPC [28], MPC [8] and GLL-MB [3]. Below we translate each predicate and then show that  
543 these predicates are equivalent to the criterion to identify v-structures in CPC [28], MPC [8] and GLL-MB [3]  
544 respectively.

- 545 1. Predicate  $OLP(T, S) = 0 \iff \forall S \in \mathcal{S}, T \notin S$ , which states that predicate is TRUE if and only if  
546  $T$  is not in any d-separation set of  $X$  and  $Y$ . This is exactly the criterion of CPC for identifying  
547 v-structures [28].
- 548 2. Predicate  $OLP(T, S) < 0.5$  indicates that only if more than half of the d-separation sets do not contain  
549  $T$ , then the UT is oriented as a v-structure. This is called majority-rule PC algorithm MPC [8] for  
550 v-structure identification.
- 551 3. Predicate  $OLP(T, S) < 1 \wedge \min\{X \sim Y | T \cup S\} > 0 \Rightarrow \exists S \in \mathcal{S}, T \notin S$  and  $X$  and  $Y$  are dependent  
552 when conditioning on  $T \cup S$ , which is the criterion used for GLL-MB [3] to identify v-structures.

553 □

## 554 A.6 Proof of Theorem 1

555 **Theorem 1.** *ML4C-Learner tends to a perfect classifier on classifying a canonical dataset with sufficient*  
556 *samples.*

557 *Proof.* According to Lemma 3, there exists strong discriminative predicate  $P$  which achieves zero loss given  
558 a canonical dataset and sufficient samples. Thus, when adequate ML model is chosen, ML4C-Learner can  
559 achieve no worse performance than  $P$  (e.g., we can set the parameters of ML4C-Learner so that it approximates  
560 predicate  $P$  initially, and then apply standard gradient descent procedure). By considering proposition 2, we  
561 complete the proof. □

## 562 B Implementation Details

### 563 B.1 Calculating conditional dependencies

564 There are several ways to measure the conditional dependence, such as p-value by testing of conditional  
565 independence, or conditional mutual information [9]. For categorical variables, a good choice is  $G^2$  test [11]. In  
566 our implementation, we adopt an approximate version of  $G^2$  statistic, and use p-value to measure the conditional  
567 dependence.

Moreover, considering p-value can easily vanish due to numerical precision in 64-bit computers. Therefore, we  
use a transformation of p-value to avoid the issue, as additional quantity to measure conditional dependency. We  
first define complementary error function as

$$g(z) = 1 - \frac{2}{\sqrt{\pi}} \int_0^z e^{-t^2} dt,$$

and we use quantity  $z$  by inverse of  $g$ :

$$z = g^{-1}(x).$$

568 Given a p-value  $x$ , we use  $g^{-1}$  as a non-linear transformation to obtain a better re-scaled quantity to measure  
569 conditional dependency. Intuitively,  $z$  can be viewed as  $z$ -sigma for a standard normal distribution, e.g., if  
570 p-value is 0.05, then  $z = 2$ , since 2-sigma indicates probability of values that lie within 2-sigma interval in a  
571 normal distribution is 0.95.

## 572 B.2 ML4C Training and inference details

### 573 B.2.1 Data synthesis details

574 **Graph structure:** We adopt the Erdős-Rényi (ER) model [13] and the Scale-Free (SF) model [2], which are  
575 two commonly used model for graph synthesis. We categorize the scale of the graph (number of nodes  $d$ ) into  
576 four classes: small, medium, large, and very large, corresponding to  $d$  being uniformly sampled from intervals  
577 [10, 20], [21, 50], [51, 100], and [101, 1000], respectively. Given the number of nodes  $d$ , the sparsity of the  
578 graph (defined as the ratio of the average number of edges to the number of nodes, i.e., the average in-degree  
579 of all nodes) is randomly sampled from a uniform distribution [1.2, 1.7]. Given the number of nodes and the  
580 expected number of edges, the graph skeleton is generated accordingly by the two random graph models. Then  
581 the skeleton is randomly oriented to a DAG by upper triangular permutation.

582 **Conditional probability table:** Now we illustrate how we come up with Conditional Probability Table (CPT)  
583 for each node. In accordance with the topological ordering of the graph, each node is first assigned its cardinality,  
584 which is randomly sampled from a truncated normal distribution  $\mathcal{N}(\mu = 2, \sigma = \frac{1.5}{m}, \min = 2)$ , where  $m$   
585 denotes the maximum number of peers of the node (i.e.  $\max\{\text{in-degree of the effect nodes of this node}\}$ ). This  
586 regularization is designed to make the forward sampling process faster and prevent some certain nodes with  
587 many cause nodes from getting stuck. Since the number of different conditions to be enumerated is exponential  
588 ( $\prod_{c \in \text{causes}} \text{cardinality}_c$ ), node with a larger maximum peers number tends to have smaller cardinality. Next, we  
589 enumerate each of its unique conditions (given by combinations of its cause nodes' cardinalities) and randomly  
590 generate its probability distribution at each condition. The probability distribution is sampled from a Dirichlet  
591 distribution with parameter  $\alpha \sim U[0.1, 1.0]$  and grid number as this code's cardinality.

592 **Training data:** Having CPT specification of each node, a sample of 10k rows of observations is obtained for  
593 each graph according to the standard Bayesian network forward sampling. This generates a total dataset of 4  
594 scales  $\times$  2 graph models  $\times$  50 graphs for each class = 400 unique graphs and the corresponding sampled data.  
595 Different SCL algorithms are then further used to extract the required features corresponding to the respective  
596 learning targets, e.g., all edges of all graphs for pairwise SCL algorithms. For our ML4C learning targets, all UTs  
597 are extracted from graphs, consisting of a total of 97,010 V-structures (label=1) and 195,691 non-V-structures  
598 (label=0).

### 599 B.2.2 XGBoost hyper-parameter settings

600 We use `xgb.XGBClassifier()`, the Python API provided by XGBoost [6], to implement the binary classifier  
601 ML4C-Learner. All hyper-parameters are set as default. We set the threshold value  $T = 0.1$ .

## 602 B.3 Post processing

603 Although ML4C-Learner achieves high accuracy on classifying UTs into v-structures or non-v-structures (UT-F1  
604 = 0.9, as shown in Table 1), it is still possible to have conflicts among the detected v-structures. We adopt  
605 a straightforward heuristic to resolve conflicts: suppose we have two conflict v-structures  $A \rightarrow B \leftarrow C$   
606 and  $B \rightarrow C \leftarrow D$ , we discard the one with lower probability score (by ML4C-Learner). We continue such  
607 pairwise conflict resolving until no more conflicts exist. We use the left v-structures to construct the partial DAG  
608 (bottom-right of Figure 1(b)). Pseudo-code is shown in Algorithm 1.

## 609 C Details of Evaluation

### 610 C.1 Evaluation metrics

611 We calculate SHD at CPDAG level. Specifically, SHD is computed between the learned CPDAG( $\hat{G}$ ) and ground  
612 truth CPDAG( $G$ ), i.e., the smallest number of edge additions, deletions, direction reversals and type changes  
613 (directed vs. undirected) to convert the output CPDAG to ground truth CPDAG. As is shown in Table 5, SHD is  
614 equal to the sum of the number of  $\mathcal{X}$ s in the table.

F1-score is then calculated based on the identifiable edges of CPDAG( $\hat{G}$ ) and CPDAG( $G$ ), where the accuracy  
(precision) is equal to True Positive Rate (TPR) and the recall (recall) is equal to 1 - False Discovery Rate (FDR).

**input** : v-structure candidates  $VC = \{v_1, \dots, v_p\}$ ,  
score querier  $s : v_i \rightarrow s_i$ , returning  $v_i$ 's probability score  
**output** : Final v-structure candidates  $FV$ , which is self-consistent.  
**Initialize**: removing v-structure set  $RV$ .  
**for**  $v_i \in VC$  **do**  
     $s_i \leftarrow s(v_i)$   
    flag  $\leftarrow$  FALSE  
    **for**  $v_j \in VC$  **do**  
         $s_j \leftarrow s(v_j)$   
        **if**  $v_i$  conflicts with  $v_j$  **and**  $s_i < s_j$  **then**  
            flag  $\leftarrow$  TRUE  
            **break**  
    **if** flag **then**  
         $SV \leftarrow SV \cup \{v_i\}$   
**FV**  $\leftarrow VC \setminus RV$ .

**Algorithm 1:** Conflict resolving

Table 5: SHD calculation details.

| in result CPDAG $\rightarrow$<br>in truth CPDAG $\downarrow$ | iden (directed) |       | uniden<br>(undirected) | missing in<br>skeleton |
|--------------------------------------------------------------|-----------------|-------|------------------------|------------------------|
|                                                              | right           | wrong |                        |                        |
| iden                                                         | ✓(1)            | ✗(2)  | ✗(3)                   | ✗(4)                   |
| uniden                                                       | ✗(5)            |       | ✓(6)                   | ✗(7)                   |
| nonexist                                                     | ✗(8)            |       | ✗(9)                   | ✓(10)                  |

Details about the specific calculation can also refer to Table 5

$$\text{precision}=\text{TPR} = \frac{(1)}{(1) + (2) + (3) + (4)},$$

$$\text{recall}=1-\text{FDR} = \frac{(1)}{(1) + (2) + (5) + (8)},$$

## 615 C.2 Full result of Table 1: End-to-end comparison

616 Here we report full results including other 5 smallest and trivial datasets. Note that 1) All F1-score degrade into  
617 0. on sachs dataset, because that sachs has no identifiable edges. 2) The rank(SHD) row is also re-calculated  
618 over full datasets.

## 619 C.3 Predicates in Table 2: Reliability

620 Table 2 shows the performance of 4 weak discriminative predicates and 4 strong discriminative predicates.  
621 Specifically, the four strong predicates are respectively 1)  $t \sim U[0, 1]$ ,  $\text{OLP}(T, \mathcal{S}) \geq t$ ; 2)  $\text{OLP}(T, \mathcal{S}) == 0$ ;  
622 3)  $\text{OLP}(T, \mathcal{S}) == 0$  and  $\{X \sim Y | \mathcal{S} \cup T\} > 0$ ; 4)  $\{X \sim Y | \mathcal{S} \vee T\} > 0$ . The four weak predicates are  
623 respectively 1)  $\{PC_X \sim PC_Y | T\} > 0$ ; 2)  $\{PC_X \sim PC_Y | \mathcal{S} \vee T\} > 0$ ; 3)  $\{X \sim Y | PC_T\} == 0$ ; 4)  
624  $\{X \sim Y | \mathcal{S} \vee PC_T\} > 0$ .

## 625 C.4 Details of Table 4: Transferability

626 To evaluate ML4C's transferability across different domains, we train on dataset generated using one config-  
627 uration, and test on another. By default the configuration is that: #nodes=50, sparsity=#edges/#nodes=1.5,  
628 generating model=ER, and sample size=10000. We conduct controlled trials on the four configuration domains  
629 listed above (shown as the four big bars of Table 4).

630 When we test transferability over one domain (e.g., the first bar, #nodes), then #nodes is set from 4 options (10,  
631 50, 100, 1k), and  $4 \times 4 = 16$  pairs of train-test experiments are conducted. For each experiment, 50 graphs  
632 are synthesized for training and another 5 graphs for test. Except for the target domain (#nodes), all the other

Table 6: Full result of Table 1.

| Datasets      |      | supervised |            |            |            |            | unsupervised |            |            |            |            |            |            | no skeleton input |            |            |            |
|---------------|------|------------|------------|------------|------------|------------|--------------|------------|------------|------------|------------|------------|------------|-------------------|------------|------------|------------|
| #nodes/#edges |      | ML4C       | Jarfo      | D2C        | RCC        | NCC        | PC           | CPC        | MPC        | GMB        | GES        | GS         | HC         | CDS               | DGNN       | BLIP       | GNIP       |
| cancer        | SHD  | <b>1.0</b> | 4          | 3          | 4          | <b>1.0</b> | 2            | <b>1.0</b> | <b>1.0</b> | <b>1.0</b> | 3          | <b>1.0</b> | <b>1.0</b> | 2                 | 4          | 4          | <b>1.0</b> |
| 5/4           | F1   | <b>1.0</b> | .00        | .25        | .4         | <b>1.0</b> | .50          | <b>1.0</b> | <b>1.0</b> | <b>1.0</b> | .25        | <b>1.0</b> | <b>1.0</b> | .50               | .4         | .4         | <b>1.0</b> |
| earthquake    | SHD  | <b>1.0</b> | 4          | 2          | 4          | <b>1.0</b> | 2            | <b>1.0</b> | <b>1.0</b> | <b>1.0</b> | <b>1.0</b> | <b>1.0</b> | 4          | <b>1.0</b>        | 4          | 5          | <b>1.0</b> |
| 5/4           | F1   | <b>1.0</b> | .00        | .50        | .00        | <b>1.0</b> | .50          | <b>1.0</b> | <b>1.0</b> | <b>1.0</b> | <b>1.0</b> | <b>1.0</b> | .00        | <b>1.0</b>        | .00        | .00        | <b>1.0</b> |
| survey        | SHD  | 1          | 4          | 5          | 4          | <b>1.0</b> | <b>1.0</b>   | 1          | 1          | <b>1.0</b> | 4          | <b>1.0</b> | 6          | 5                 | 6          | 6          | 6          |
| 6/6           | F1   | .83        | .50        | .25        | .33        | <b>1.0</b> | <b>1.0</b>   | .83        | .83        | <b>1.0</b> | .44        | <b>1.0</b> | .6         | .25               | .6         | .6         | .6         |
| asia          | SHD  | <b>1.0</b> | 5          | 7          | 1          | <b>1.0</b> | 1            | 3          | <b>1.0</b> | <b>1.0</b> | <b>1.0</b> | <b>1.0</b> | 2          | 16                | 6          | 2          | 2          |
| 8/8           | F1   | <b>1.0</b> | .33        | .15        | .80        | <b>1.0</b> | .80          | .67        | <b>1.0</b> | <b>1.0</b> | <b>1.0</b> | <b>1.0</b> | .67        | .20               | .57        | .91        | .91        |
| sachs         | SHD  | <b>0</b>   | 9          | 11         | 8          | 12         | 13           | <b>0</b>   | <b>0</b>   | 13         | 14         | 11         | <b>0</b>   | 8                 | 16         | 1          | <b>0</b>   |
| 11/17         | F1   | <b>.00</b> | <b>.00</b> | <b>.00</b> | <b>.00</b> | <b>.00</b> | <b>.00</b>   | <b>.00</b> | <b>.00</b> | <b>.00</b> | <b>.00</b> | <b>.00</b> | <b>.00</b> | <b>.00</b>        | <b>.00</b> | <b>.00</b> | <b>.00</b> |
| child         | SHD  | <b>1.0</b> | 18         | 16         | 18         | 20         | 22           | 13         | 9          | 20         | 15         | 13         | 13         | 18                | 23         | <b>0</b>   | <b>0</b>   |
| 20/25         | F1   | <b>1.0</b> | .24        | .43        | .42        | .12        | .12          | .00        | .74        | .12        | .47        | .59        | .57        | .34               | .25        | <b>1.0</b> | <b>1.0</b> |
| insurance     | SHD  | <b>5</b>   | 41         | 30         | 34         | 28         | 36           | 34         | 21         | 29         | 34         | 28         | 19         | 36                | 53         | 35         | 14         |
| 27/52         | F1   | <b>.89</b> | .26        | .44        | .42        | .44        | .39          | .00        | .66        | .55        | .46        | .56        | .76        | .36               | .05        | .51        | .82        |
| water         | SHD  | 5          | 33         | 43         | 31         | <b>1.0</b> | 4            | 60         | 7          | 8          | 38         | 27         | 38         | 18                | 61         | 65         | 52         |
| 32/66         | F1   | .94        | .52        | .34        | .56        | <b>1.0</b> | .97          | .00        | .91        | .87        | .49        | .62        | .46        | .76               | .00        | .20        | .50        |
| mildew        | SHD  | 6          | -          | 17         | 25         | 34         | 21           | -          | -          | 7          | <b>3</b>   | 9          | 23         | 18                | 52         | 36         | -          |
| 35/46         | F1   | .87        | -          | .68        | .50        | .33        | .56          | -          | -          | .85        | <b>.93</b> | .80        | .64        | .65               | .19        | .41        | -          |
| alarm         | SHD  | <b>1</b>   | 21         | 26         | 18         | 20         | 20           | 20         | 6          | 17         | 8          | 3          | 21         | 18                | 46         | 17         | 2          |
| 37/46         | F1   | <b>.98</b> | .57        | .44        | .64        | .57        | .57          | .57        | .92        | .64        | .86        | .94        | .66        | .62               | .12        | .82        | .98        |
| barley        | SHD  | 5          | 48         | 55         | 50         | <b>1.0</b> | 3            | -          | -          | 8          | 42         | -          | 34         | 50                | 87         | 60         | 42         |
| 48/84         | F1   | .95        | .46        | .38        | .44        | <b>1.0</b> | .96          | -          | -          | .91        | .59        | -          | .72        | .43               | .00        | .48        | .67        |
| hailfinder    | SHD  | 11         | 47         | 41         | 43         | <b>1.0</b> | 17           | -          | -          | 26         | 60         | -          | 59         | 44                | 76         | 111        | 118        |
| 56/66         | F1   | .80        | .37        | .45        | .42        | <b>1.0</b> | .85          | -          | -          | .70        | .21        | -          | .23        | .42               | .00        | .18        | .12        |
| hepar2        | SHD  | <b>0</b>   | 54         | 81         | 59         | <b>0</b>   | 35           | 27         | 37         | 14         | 46         | 40         | 35         | 75                | 123        | 79         | 61         |
| 70/123        | F1   | <b>1.0</b> | .59        | .34        | .54        | <b>1.0</b> | .72          | .81        | .70        | .89        | .75        | .70        | .81        | .39               | .00        | .54        | .68        |
| win95pts      | SHD  | 1          | 65         | 51         | 33         | <b>1.0</b> | 8            | 42         | 7          | 5          | 32         | 21         | 16         | 50                | 112        | 103        | -          |
| 76/112        | F1   | .99        | .43        | .54        | .73        | <b>1.0</b> | .95          | .64        | .95        | .97        | .77        | .85        | .91        | .57               | .00        | .47        | -          |
| pathfinder    | SHD  | 25         | 157        | 145        | 151        | <b>0</b>   | 150          | -          | -          | 147        | 158        | -          | 168        | 148               | 196        | 241        | -          |
| 109/195       | F1   | .77        | .21        | .29        | .21        | <b>1.0</b> | .29          | -          | -          | .30        | .29        | -          | .28        | .31               | .00        | .07        | -          |
| munin1        | SHD  | <b>10</b>  | 169        | 154        | 153        | 72         | 86           | 117        | -          | 84         | 109        | -          | 233        | 151               | -          | 257        | -          |
| 186/273       | F1   | <b>.97</b> | .42        | .47        | .46        | .77        | .71          | .58        | -          | .72        | .67        | -          | .26        | .50               | -          | .42        | -          |
| andes         | SHD  | <b>0</b>   | 226        | 209        | 246        | <b>1.0</b> | 4            | 83         | 4          | 5          | 47         | 15         | 38         | 149               | -          | 175        | -          |
| 223/338       | F1   | <b>1.0</b> | .35        | .41        | .29        | <b>1.0</b> | .99          | .75        | .99        | .98        | .92        | .96        | .92        | .60               | -          | .76        | -          |
| diabetes      | SHD  | 25         | 220        | 395        | 237        | 48         | <b>0</b>     | -          | -          | 204        | 146        | -          | 592        | 368               | -          | 534        | -          |
| 413/602       | F1   | .96        | .62        | .38        | .62        | .96        | <b>1.0</b>   | -          | -          | .68        | .77        | -          | .03        | .43               | -          | .43        | -          |
| pigs          | SHD  | <b>0</b>   | 350        | 332        | 263        | 400        | 400          | -          | -          | 268        | <b>0</b>   | -          | 532        | 316               | -          | 6          | -          |
| 441/592       | F1   | <b>1.0</b> | .44        | .46        | .59        | .35        | .35          | -          | -          | .56        | <b>1.0</b> | -          | .18        | .50               | -          | 1.0        | -          |
| link          | SHD  | <b>0</b>   | 731        | 630        | 638        | 749        | 737          | -          | -          | 204        | 324        | -          | 1047       | 400               | -          | 947        | -          |
| 724/1125      | F1   | <b>1.0</b> | .38        | .45        | .45        | .39        | .40          | -          | -          | .81        | .80        | -          | .14        | .64               | -          | .49        | -          |
| munin         | SHD  | 72         | 967        | 790        | 816        | <b>0</b>   | 156          | -          | -          | 458        | 661        | -          | 1397       | 795               | -          | 1599       | -          |
| 1041/1397     | F1   | .95        | .36        | .48        | .44        | <b>1.0</b> | .89          | -          | -          | .69        | .62        | -          | .00        | .51               | -          | .29        | -          |
| munin2        | SHD  | <b>118</b> | 554        | 611        | 646        | 1052       | 898          | -          | -          | 536        | 632        | -          | 1240       | 753               | -          | 1321       | -          |
| 1003/1244     | F1   | <b>.92</b> | .60        | .56        | .55        | .19        | .30          | -          | -          | .57        | .58        | -          | .01        | .49               | -          | .46        | -          |
| munin3        | SHD  | <b>113</b> | 616        | 629        | 688        | 1048       | 860          | -          | -          | 544        | 566        | -          | 1306       | 819               | -          | 1539       | -          |
| 1041/1306     | F1   | <b>.92</b> | .58        | .57        | .54        | .25        | .37          | -          | -          | .60        | .65        | -          | .00        | .46               | -          | .26        | -          |
| munin4        | SHD  | <b>126</b> | 696        | 658        | 776        | 1058       | 876          | -          | -          | 649        | 618        | -          | 1388       | 812               | -          | 1627       | -          |
| 1038/1388     | F1   | <b>.93</b> | .54        | .56        | .50        | .29        | .39          | -          | -          | .55        | .64        | -          | .00        | .49               | -          | .28        | -          |
| rank(SHD)     | mean | <b>1.6</b> | 9.5        | 8.9        | 8.3        | 4.7        | 6.7          | 9.4        | 7.9        | 4.2        | 6.1        | 8.2        | 8.0        | 7.9               | 13.5       | 10.9       | 9.5        |
|               | ±std | <b>1.0</b> | 3.1        | 3.6        | 2.3        | 4.3        | 3.8          | 4.3        | 4.9        | 3.1        | 3.7        | 4.6        | 3.7        | 2.7               | 1.8        | 3.6        | 5.0        |
| UT-F1         | mean | <b>.90</b> | .22        | .19        | .27        | .66        | .50          | .53        | .87        | .59        | .54        | .77        | .47        | .30               | .09        | .36        | .70        |
|               | ±std | <b>.13</b> | .17        | .13        | .18        | .40        | .34          | .33        | .16        | .32        | .28        | .24        | .35        | .22               | .07        | .29        | .33        |

633 domains use the default configuration. The result SHD and F1-score are reported as mean value and standard  
634 deviation over the five test graphs.

## 635 D Code and Data

### 636 D.1 URLs of all competitors

637 We use open-source codes of other algorithms for evaluation.

638 For Jarfo, RCC, NCC, GES, GS(Grow-Shrink), and CDS, we use the API provided by Causal Discovery  
639 Toolbox [18]: <https://github.com/FenTechSolutions/CausalDiscoveryToolbox>

640 For HC(Hill-Climbing) we use pgmpy <https://github.com/pgmpy/pgmpy> with BDeu score.

641 For PC we use the official R package pcalg <https://cran.r-project.org/web/packages/pcalg/>.

642 For Conservative-PC and Majority-rule PC, we slightly modify the source code of pcalg to enable a faster run  
643 on large scale datasets. GLL-MB is also implemented based on pcalg. Reviewers can download our modified  
644 implementation of these 3 algorithms from <http://ml4c.xyz>

## 645 D.2 Algorithms starting from data: DAG-GNN/BLIP/GOBNILP

### 646 D.2.1 Code URL

- 647 1. GOBNILP: <https://bitbucket.org/jamescussens/pygobnilp/>
- 648 2. BLIP: <https://cran.r-project.org/web/packages/r.blip/>
- 649 3. DAG-GNN: We use a repository with a standard and clean version of the DAG-GNN algorithm, which  
650 is well maintained and can be found at [https://github.com/ronikobrosly/DAG\\_from\\_GNN/](https://github.com/ronikobrosly/DAG_from_GNN/).

### 651 D.2.2 Hyper-parameter settings

- 652 1. Time limit: The running time of all programs is limited to 24 hours.
- 653 2. Max-in-degree: The max-in-degree threshold for BILP is set to 6. The max-in-degree threshold for  
654 GOBNILP is set to 3.
- 655 3. Configurations of DAG-GNN are as follows. Epochs=300, batch size=100, learning rate=3e-3, graph  
656 threshold=0.3. Graph threshold is a threshold for weighted adjacency matrix (i.e., any weights > -0.3  
657 and < 0.3 means the two variables are not adjacent).

### 658 D.2.3 Verifying the results of DAG-GNN

659 To make sure DAG-GNN is correctly executed, we have carefully experiment DAG-GNN from the following  
660 two aspects:

661 **Reproducing the results of paper [38]** We take the child dataset as an example to test the reproducibility,  
because the data set has been reported by [38]. As can be seen from Table 7, the BIC scores are similar to

Table 7: Reproducing results for child

|     | groundtruth | child    |
|-----|-------------|----------|
| BIC | -1.23e+4    | -1.36e+4 |

662 the results reported in the original paper (child: -1.38e+4). That is to say, the results in Yu et al.’s paper are  
663 reproduced by us.  
664

665 **Different graph thresholds** The following are the BIC scores on the data sets of alarm and water with  
different graph thresholds. The graph threshold recommended by [38] is 0.3. It can be seen that the performance

Table 8: Results with different graph thresholds

|       | Groundtruth | 0.1      | 0.2      | 0.3      | 0.4      | 0.5      |
|-------|-------------|----------|----------|----------|----------|----------|
| alarm | -1.08e+5    | -1.90e+5 | -1.44e+5 | -1.59e+5 | -1.77e+5 | -1.91e+5 |
| water | -1.35e+5    | -1.32e+5 | -1.37e+5 | -1.44e+5 | -1.53e+5 | -1.62e+5 |

666 is stable when the threshold is around 0.3. We have verified that there are similar conclusions on other data sets.  
667 Therefore 0.3 should be a reasonable threshold.  
668

## 669 D.3 ML4C: Code and data

670 For reviewers to check reproducibility of our results reported in §5, we put our code and data on an anonymous  
671 site <http://ml4c.xyz>
